# Supplementary material
Source: Springer Nature journal article supplement (https://www.springermedizin.de/resource/supplementary/12916_2013_939_MOESM1_ESM.pdf/9598884)
Supplement: MOESM1 [file 9598884]

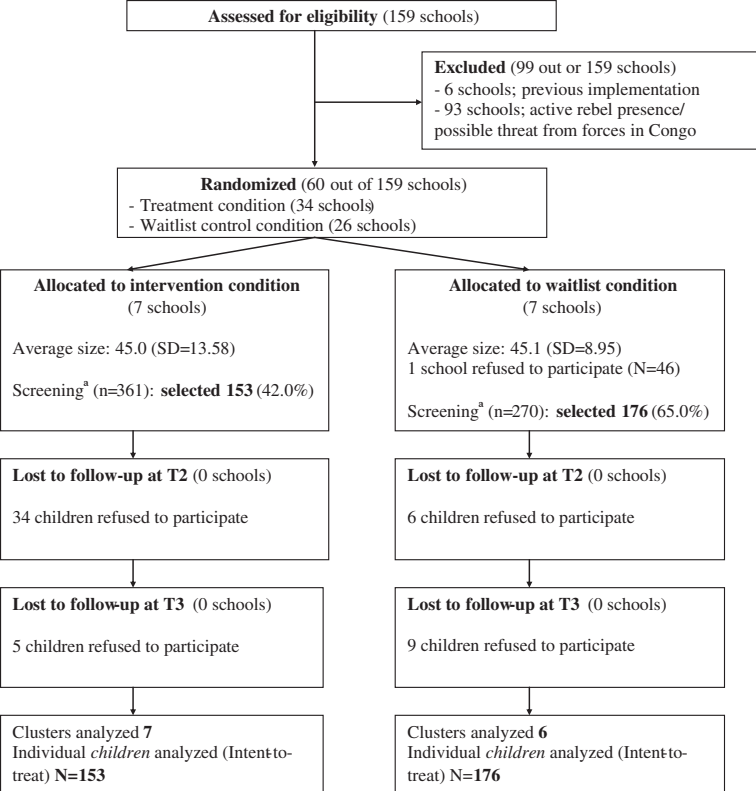

<sup>a</sup> Children were excluded if (a) they did not meet inclusion criteria (experience at least one political violence event and scored higher than the cut-off on PTSD, depressive or anxiety symptoms) or (b) met exclusion criteria
